# Supplementary material
Source: MDPI journal article supplement (https://www.mdpi.com/2073-4344/8/4/149)
Supplement: s1 [file s1]

# Immobilization/Stabilization of Ficin Extract on Glutaraldehyde-Activated Agarose Beads. Variables That Control the Final Stability and Activity in Protein Hydrolyses

El-Hocine Siar, Sara Arana-Peña, Oveimar Barbosa, Mohammed Nasreddine Zidoune and Roberto Fernandez-Lafuente

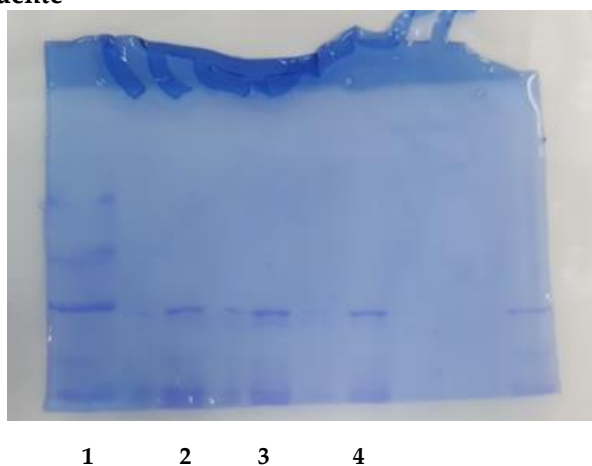

**Figure S1.** SDS PAGE of ficin extract (1 mg/ml). Lane 1 Molecular weight markers, Lane 2, 3, 4 different ficin extracts used in this paper.
